# Supplementary material for: Overview of “Systematic Reviews” of the Built Environment's Effects on Mental Health
Source: J Environ Public Health. 2020 Mar 19;2020:9523127. doi: 10.1155/2020/9523127 (PMC7106933; doi:10.1155/2020/9523127)
Supplement: Supplementary Materials — Supplementary Material file includes Tables S1 (PRISMA 2009 checklist) and S2 (Search strategy). [file 9523127.f1.zip]

Archive with 2 entries (2 files):
- 9523127.f1/Supplementary material S2.docx
- 9523127.f1/Table S1. PRISMA 2009 checklist.doc
